## Targeted Cleavage and Polyadenylation of RNA by CRISPR-Cas13

Kelly M. Anderson<sup>1,2</sup>, Pornthida Poosala<sup>1,2</sup>, Sean R. Lindley<sup>1,2</sup> and Douglas M. Anderson<sup>1,2,\*</sup>

<sup>1</sup>Center for RNA Biology, <sup>2</sup>Aab Cardiovascular Research Institute, University of Rochester School of Medicine and Dentistry, Rochester, New York, U.S.A., 14642

\*Corresponding Author:

Douglas M. Anderson: [doug\\_anderson@urmc.rochester.edu](mailto:doug_anderson@urmc.rochester.edu)

Keywords: NUDT21, PspCas13b, PAS, CPSF, CFIm, Poly(A), SREBP1

**Post-transcriptional cleavage and polyadenylation of messenger and long noncoding RNAs is coordinated by a supercomplex of ~20 individual proteins within the eukaryotic nucleus<sup>1,2</sup>. Polyadenylation plays an essential role in controlling RNA transcript stability, nuclear export, and translation efficiency<sup>3-6</sup>. More than half of all human RNA transcripts contain multiple polyadenylation signal sequences that can undergo alternative cleavage and polyadenylation during development and cellular differentiation<sup>7,8</sup>. Alternative cleavage and polyadenylation is an important mechanism for the control of gene expression and defects in 3' end processing can give rise to myriad human diseases<sup>9,10</sup>. Here we show that fusion of catalytically dead Cas13 to a single mammalian polyadenylation factor, Nudix hydrolase 21 (NUDT21), allows for site-specific CRISPR-Cas13-guided cleavage and polyadenylation of RNA in mammalian cells. This approach, which we named *Postscriptr*, can be utilized for the non-genomic manipulation of gene expression and may have potential future therapeutic applications for treating human RNA processing diseases.**

The 3' site of RNA cleavage and addition of a poly(A) tail is precisely determined by intrinsic polyadenylation signal (PAS) sequences typically composed of a canonical hexamer motif AAUAAA and upstream and downstream sequence elements (USE and DSE, respectively)<sup>11</sup>. The AAUAAA PAS motif is found ~25 nucleotides (nts) upstream of the RNA cleavage site and is directly bound by two components of the cleavage and polyadenylation specific factor (CPSF) complex: cleavage and polyadenylation factor 30 (CPSF30) and WD repeat-containing protein 33 (WDR33)<sup>12</sup>. Components of the cleavage factor Im (CFIm) complex bind directly to the USE motif UGUA which occurs

~50 nts upstream of the RNA cleavage site<sup>8</sup>. In transcripts that lack the canonical AAUAAA motif, the CFIm complex functions as the primary determinant of poly(A) signal recognition<sup>13</sup>. Nudix Hydrolase 21 (NUDT21/CPSF5), the RNA binding component of the CFIm complex, functions as an activator of 3' end processing and regulator of alternative polyadenylation site choice<sup>14</sup>. Binding of the CFIm complex is among the first steps in 3' end processing and functions to recruit additional co-factors to the 3' end processing machinery<sup>15,16</sup>. Direct interactions between components of the polyadenylation supercomplex and the C-terminal domain of RNA polymerase II trigger the disassembly of the elongation complex and coordinate 3' end processing with transcription termination<sup>17</sup>.

Bacterial-derived Type VI CRISPR-Cas systems encode a family of RNA-guided endoribonucleases, named Cas13<sup>18-20</sup>. Similar to Cas9, mutation of residues within the nuclease domains of Cas13 generate a catalytically dead enzyme that retains RNA binding affinity (dCas13). Recently, fusion of dCas13 to mammalian RNA modifying enzymes has been shown to be useful for manipulating RNA in mammalian cells<sup>21-23</sup>. To direct polyadenylation complex formation using dCas13, we designed three fusion proteins combining the catalytically dead Type VI-B Cas13 enzyme from *Prevotella* sp. P5-125 (dPspCas13b) with RNA binding components of the human 3' end processing machinery, including CPSF30, WDR33, and NUDT21 (Fig. 1a). We included an N-terminal 3x FLAG epitope tag for protein detection and a long flexible peptide linker [GGGGSGGGGS] between dPspCas13b and the polyadenylation components to reduce the likelihood of steric hindrance.

While previous dCas13-mediated RNA editing applications occurred within the cytosol, post-transcriptional cleavage and polyadenylation of RNA occurs within the nucleus and therefore requires efficient nuclear localization of dCas13 fusion proteins. The large size of dCas13 proteins and their lack of intrinsic nuclear localization signals (NLSs) could prevent their efficient nuclear localization in mammalian cells. Consistent with this, dPspCas13b fusion proteins lacking a mammalian NLS were retained in the cytoplasm when expressed in mammalian COS7 cells, as detected by immunocytochemistry using an anti-FLAG antibody (Supplementary Fig. 1). Surprisingly, the addition of a classical SV40 NLS or bipartite NLS from nucleoplasmin (NPM) did not promote efficient nuclear localization of dPspCas13b fusion proteins (Supplementary Fig. 1). However, the addition of a single copy of the non-classical bipartite NLS derived from the yeast Ty1 retrotransposon, which utilizes normal cellular protein import machinery but contains a linker sequence nearly three times as long as a typical bipartite NLS<sup>24,25</sup>, resulted in robust nuclear localization of all three dPspCas13b fusion proteins (Fig. 1b).

We designed a reporter gene to detect alternative cleavage and polyadenylation (APA) in mammalian cells capable of switching between fluorescent and non-fluorescent open reading frames of superfolder GFP (sfGFP) (Fig. 2). sfGFP forms a beta barrel comprised of 11 antiparallel beta strands, which can tolerate sequence insertions between the 10<sup>th</sup> and 11<sup>th</sup> beta strands but loses fluorescence if the 11<sup>th</sup> beta strand is removed<sup>26-28</sup>. We generated an sfGFP reporter construct with the coding sequence for the 11<sup>th</sup> beta strand embedded within a prototypical mammalian intron (second intron of the rabbit beta globin gene) (sfGFP<sub>papa</sub>) (Fig. 2a). The coding

sequence of the 11<sup>th</sup> beta strand was designed in-frame with the upstream sfGFP coding sequence so that translation of the proximal open reading frame would encode a complete sfGFP sequence, albeit with a 14 amino acid linker sequence between the 10<sup>th</sup> and 11<sup>th</sup> beta strand resulting from translation of the intervening intronic sequence [sfGFP(1-10)-L-11]. Expression of the sfGFP<sub>papa</sub> reporter in mammalian COS7 cells resulted in almost no detectable fluorescence, suggesting efficient removal of the intron containing the 11<sup>th</sup> beta strand and translation of the open reading frame encoding the non-fluorescent sfGFP(1-10) protein (Fig. 2b-d). However, cells expressing the sfGFP<sub>papa</sub> reporter treated with the splicing inhibitor isoginkgetin<sup>29</sup> resulted in detectable green fluorescence after 24 hours, demonstrating that the modified sfGFP open reading frame containing the linker between the 10<sup>th</sup> and 11<sup>th</sup> beta strands is functional (Supplementary Fig. 2a,b). Insertion of an SV40 polyadenylation cassette downstream of coding sequence for the 11<sup>th</sup> beta strand of sfGFP (sfGFP<sub>papa</sub>-pA) resulted in robust green fluorescence, demonstrating that intronic cleavage and polyadenylation of the sfGFP<sub>papa</sub> reporter promotes utilization of the functional sfGFP(1-10)-L-11 open reading frame (Fig. 2e-h). Together, these data demonstrate that the sfGFP<sub>papa</sub> reporter gene encodes both functional and non-functional open reading frames which can be switched in response to changes in splicing or intronic cleavage and polyadenylation.

To determine whether the dPspCas13b fusion proteins could promote CRISPR-Cas13-mediated cleavage and polyadenylation of the sfGFP<sub>papa</sub> reporter mRNA, we designed a crRNA targeting an intronic sequence downstream of the coding sequence of the 11<sup>th</sup> beta strand of sfGFP in the sfGFP<sub>papa</sub> reporter (Fig. 3a). In live cell assays, no fluorescence signal was detected in cells expressing any of the dPspCas13b fusion

proteins using a non-targeting crRNA, relative to the sfGFP<sub>Papa</sub> reporter alone (Fig. 3b, Supplementary Fig. 3). However, expression of the intron targeting crRNA with the dPspCas13b-NUDT21 fusion protein, but not the CPSF30 or WDR33 fusions proteins, resulted in detectable green fluorescent cells after 24 hours (Fig. 3b, Supplementary Fig. 3).

We performed 3' rapid amplification of cDNA ends (3' RACE) to determine whether the fluorescence signal was due to CRISPR-Cas13-mediated targeted cleavage and polyadenylation of the sfGFP<sub>Papa</sub> reporter mRNA. RACE compatible cDNA was generated from total RNA using a poly(T) oligonucleotide containing two 5' nested primer sequences. Using two nested reporter specific primers upstream of the crRNA target sequence, we detected a high molecular weight band corresponding to the predicted size of the sfGFP<sub>Papa</sub> pre-mRNA transcript for both samples (Fig. 3c). Interestingly, in cells targeted with the intronic crRNA, we detected an additional broad band of smaller RACE products, suggesting that cleavage and polyadenylation may have occurred near the targeted crRNA sequence (Fig. 3c,d). To determine the sequence of the 3' RACE products, we gel purified the 200-500 base pair region and subcloned them using TOPO TA cloning. We isolated and sequenced 11 unique clones which revealed that sfGFP<sub>Papa</sub> mRNAs were cleaved and polyadenylated at sites ranging from -7 to +110 nts relative to the 3' side of the crRNA target sequence (Fig. 3e). In contrast to mammalian cleavage which occurs primarily after a CA dinucleotide, *Postscriptr*-induced cleavage most often occurred at a C or T nucleotide (Fig. 3f). Interestingly, four of the 11 clones showed a 3' addition of non-templated nucleotides prior to poly (A) tail elongation, which is thought to be rare in mammalian species but

observed in plants<sup>30</sup>. These data demonstrate that the dPspCas13b-NUDT21 fusion protein was sufficient to induce cleavage and polyadenylation of a reporter mRNA at an intronic sequence targeted by a crRNA.

To determine whether *Postscriptr* could promote alternative cleavage and polyadenylation of an endogenously expressed human mRNA, we targeted transcripts encoding the human sterol regulatory element binding protein 1 (SREBP1). SREBP1 is a ubiquitously expressed transcription factor which transactivates genes that contain sterol regulatory elements (SREs) and encode proteins controlling lipid synthesis and uptake, such as the low density lipoprotein receptor (*LDLR*) (Fig. 4)<sup>31</sup>. SREBP1 is first synthesized as an inactive precursor protein anchored to the membrane of the endoplasmic reticulum (ER)<sup>32</sup> (Fig. 4a). In sterol depleted cells, proteolytic cleavage of SREBP1 by S2P liberates an N-terminal DNA-binding fragment that allows SREBP1 to enter the nucleus and activate gene transcription<sup>33</sup> (Fig. 4a). We note that *SREBP1* transcripts in the liver can utilize an endogenous intronic PAS and generate a protein fragment terminated at a site adjacent to the transcriptionally active S2P cleavage product [SREBP1a $\Delta$ , AB373958; SREBP1c $\Delta$ , AB373959] (Fig. 4b,c). We were interested in whether *Postscriptr* could promote the utilization of the SREBP1 intronic PAS in a non-liver cell line and upregulate *SREBP1* target gene expression. We co-expressed the dPspCas13b-NUDT21 fusion protein with either an *SREBP1*-targeting or non-targeting crRNA in human HEK293T cells (Fig. 4d). Performing 3' RACE, we detected a strong band corresponding to the approximate size of the predicted 3'RACE product in cells transfected with the *SREBP1*-targeting crRNA, and no bands were detected in cells transfected with the control crRNA (Supplementary Fig. 4). Direct

sequencing of this 3' RACE product revealed that *SREBP1* transcripts were cleaved and polyadenylated 71 nts downstream of the crRNA target sequence and that splicing of the terminal exon was inhibited (Fig. 4d,e). Cleavage occurred at a CA dinucleotide 36 nts downstream of the reported cleavage site in humans and generated an open reading frame which terminated at a stop codon within the retained intron sequence, adding an additional 16 amino acids to the C-terminus of SREBP1 (Fig. 4e,f). Gene expression analyses in a mixed population of *SREBP1*-targeted and non-targeted HEK293T cells showed that the overall *SREBP1* transcript levels were unchanged when using qRT-PCR and PCR primers upstream of the crRNA target sequence (Fig. 4g). However, primers spanning the targeted exon showed a significant decrease in *SREBP1* transcript levels in targeted versus non-targeted cells, suggesting that transcription termination may be coupled with *Postscriptr*-mediated cleavage and polyadenylation (Fig. 4h). Interestingly, in *SREBP1*-targeted cells, we further detected a significant increase in transcript levels of the well-characterized SREBP-responsive gene, *LDLR* (Fig. 4i).

In conclusion, we have developed a unique CRISPR-Cas13 RNA modifying technology to induce site-specific cleavage and polyadenylation of RNA in mammalian cells. This approach utilizes a dPspCas13b-NUDT21 fusion protein, which we have shown requires a non-classical bipartite NLS for nuclear localization in mammalian cells. We demonstrated that the dPspCas13b-NUDT21 fusion protein was sufficient to promote cleavage and polyadenylation at an intronic sequence within a novel gain-of-function fluorescent reporter, sfGFP<sub>papa</sub>. The ability of *Postscriptr* to promote cleavage and polyadenylation of the sfGFP<sub>papa</sub> reporter was striking, given that the second intron



of the rabbit beta globin gene does not contain any known endogenous PAS sequences. These findings show that NUDT21 can facilitate the recruitment of a functional 3' end processing complex at a crRNA targeted sequence. While only 25 kDa in size, NUDT21 forms a number of direct protein interactions with key RNA processing components, including Poly(A) Polymerase<sup>34</sup>. These findings support the role of NUDT21 as an emerging master regulator of alternative cleavage and polyadenylation site choice in mammals<sup>35,36</sup>.

We further showed that *Postscriptr* could direct cleavage and polyadenylation at an endogenous intronic PAS of the human *SREBP1* gene. For both the sfGFP<sub>Papa</sub> reporter and *SREBP1*, the dPspCas13b-NUDT21 fusion protein induced cleavage and polyadenylation 3' to the crRNA target sequence. However, it is currently unclear why editing of the intronic *SREBP1* PAS resulted in a single cleavage site, whereas cleavage of the sfGFP<sub>Papa</sub> reporter occurred across a range of ~100 nts. We speculate that intrinsic PAS flanking sequences may be required to help guide cleavage site specificity. Future studies are necessary to delineate the minimal upstream and downstream sequence elements which may enhance the precision of *Postscriptr* targeting at ectopic target sites.

It is currently unclear why fusion of dPspCas13b to either CPSF30 or WDR33 were not sufficient to promote cleavage and polyadenylation of the sfGFP<sub>Papa</sub> reporter in our assays. Since both CPSF30 and WDR33 have been shown to make direct contacts with the AAUAAA PAS motif, one possibility may be a requirement of the PAS RNA to promote a ternary complex formation among these components. Alternatively, tethering of CPSF30 and WDR33 may alone be insufficient to induce 3' end processing, a

possibility consistent with data showing that insertion of a minimal synthetic PAS (including an AAUAAA motif and downstream sequence elements) within the second intron of a rabbit beta globin gene reporter was insufficient to promote intronic cleavage and polyadenylation<sup>37</sup>.

While the endonuclease activity of Cas13 is highly effective for gene knockdown in mammalian cells<sup>21</sup>, *Postscriptr* technology allows for a unique approach to manipulate RNA which may be useful for the study of 3' end RNA processing and for the manipulation of endogenous gene expression. Here we have utilized this technology to manipulate the alternative cleavage and polyadenylation at intronic pre-mRNA transcript sequences, however this approach could be applied to other mRNA transcript regions or different RNA species. One interesting example would be the interrogation of lncRNA function, many of which control gene expression through recruitment of chromatin modifying complexes or by establishing permissive local chromatin environments<sup>38-41</sup>. *Postscriptr*-guided cleavage, polyadenylation, and transcriptional termination of lncRNAs could allow for the identification of functional lncRNA domains or functional genomic regions. Lastly, numerous loss-of-function mutations identified within poly(A) signal sequences have been shown to result in abnormal RNA processing and can cause human disease<sup>42-44</sup>. Here, future therapeutic applications of *Postscriptr* technology may be a useful approach for the rescue of normal RNA cleavage and polyadenylation site choice.

## REFERENCES

- 1 Mandel, C. R., Bai, Y. & Tong, L. Protein factors in pre-mRNA 3'-end processing. *Cell Mol Life Sci* **65**, 1099-1122, doi:10.1007/s00018-007-7474-3 (2008).
- 2 Xiang, K., Tong, L. & Manley, J. L. Delineating the structural blueprint of the pre-mRNA 3'-end processing machinery. *Mol Cell Biol* **34**, 1894-1910, doi:10.1128/MCB.00084-14 (2014).
- 3 Colgan, D. F. & Manley, J. L. Mechanism and regulation of mRNA polyadenylation. *Genes Dev* **11**, 2755-2766 (1997).
- 4 Guhaniyogi, J. & Brewer, G. Regulation of mRNA stability in mammalian cells. *Gene* **265**, 11-23 (2001).
- 5 Wu, X. & Brewer, G. The regulation of mRNA stability in mammalian cells: 2.0. *Gene* **500**, 10-21, doi:10.1016/j.gene.2012.03.021 (2012).
- 6 Carmody, S. R. & Wente, S. R. mRNA nuclear export at a glance. *J Cell Sci* **122**, 1933-1937, doi:10.1242/jcs.041236 (2009).
- 7 Tian, B. & Manley, J. L. Alternative polyadenylation of mRNA precursors. *Nat Rev Mol Cell Biol* **18**, 18-30, doi:10.1038/nrm.2016.116 (2017).
- 8 Elkon, R., Ugalde, A. P. & Agami, R. Alternative cleavage and polyadenylation: extent, regulation and function. *Nat Rev Genet* **14**, 496-506, doi:10.1038/nrg3482 (2013).
- 9 Chang, J. W., Yeh, H. S. & Yong, J. Alternative Polyadenylation in Human Diseases. *Endocrinol Metab (Seoul)* **32**, 413-421, doi:10.3803/EnM.2017.32.4.413 (2017).
- 10 Curinha, A., Oliveira Braz, S., Pereira-Castro, I., Cruz, A. & Moreira, A. Implications of polyadenylation in health and disease. *Nucleus* **5**, 508-519, doi:10.4161/nucl.36360 (2014).
- 11 Tian, B. & Graber, J. H. Signals for pre-mRNA cleavage and polyadenylation. *Wiley Interdiscip Rev RNA* **3**, 385-396, doi:10.1002/wrna.116 (2012).

- 12 Chan, S. L. *et al.* CPSF30 and Wdr33 directly bind to AAUAAA in mammalian mRNA 3' processing. *Genes Dev* **28**, 2370-2380, doi:10.1101/gad.250993.114 (2014).
- 13 Venkataraman, K., Brown, K. M. & Gilmartin, G. M. Analysis of a noncanonical poly(A) site reveals a tripartite mechanism for vertebrate poly(A) site recognition. *Genes Dev* **19**, 1315-1327, doi:10.1101/gad.1298605 (2005).
- 14 Zhu, Y. *et al.* Molecular Mechanisms for CFIm-Mediated Regulation of mRNA Alternative Polyadenylation. *Mol Cell* **69**, 62-74 e64, doi:10.1016/j.molcel.2017.11.031 (2018).
- 15 Ruegsegger, U., Blank, D. & Keller, W. Human pre-mRNA cleavage factor Im is related to spliceosomal SR proteins and can be reconstituted in vitro from recombinant subunits. *Mol Cell* **1**, 243-253 (1998).
- 16 Brown, K. M. & Gilmartin, G. M. A mechanism for the regulation of pre-mRNA 3' processing by human cleavage factor Im. *Mol Cell* **12**, 1467-1476 (2003).
- 17 Zhao, J., Hyman, L. & Moore, C. Formation of mRNA 3' ends in eukaryotes: mechanism, regulation, and interrelationships with other steps in mRNA synthesis. *Microbiol Mol Biol Rev* **63**, 405-445 (1999).
- 18 Abudayyeh, O. O. *et al.* C2c2 is a single-component programmable RNA-guided RNA-targeting CRISPR effector. *Science* **353**, aaf5573, doi:10.1126/science.aaf5573 (2016).
- 19 Smargon, A. A. *et al.* Cas13b Is a Type VI-B CRISPR-Associated RNA-Guided RNase Differentially Regulated by Accessory Proteins Csx27 and Csx28. *Mol Cell* **65**, 618-630 e617, doi:10.1016/j.molcel.2016.12.023 (2017).
- 20 East-Seletsky, A., O'Connell, M. R., Burstein, D., Knott, G. J. & Doudna, J. A. RNA Targeting by Functionally Orthogonal Type VI-A CRISPR-Cas Enzymes. *Mol Cell* **66**, 373-383 e373, doi:10.1016/j.molcel.2017.04.008 (2017).
- 21 Abudayyeh, O. O. *et al.* RNA targeting with CRISPR-Cas13. *Nature* **550**, 280-284, doi:10.1038/nature24049 (2017).

- 22 Cox, D. B. T. *et al.* RNA editing with CRISPR-Cas13. *Science* **358**, 1019-1027, doi:10.1126/science.aag0180 (2017).
- 23 O'Connell, M. R. Molecular Mechanisms of RNA Targeting by Cas13-containing Type VI CRISPR-Cas Systems. *J Mol Biol* **431**, 66-87, doi:10.1016/j.jmb.2018.06.029 (2019).
- 24 McLane, L. M., Pulliam, K. F., Devine, S. E. & Corbett, A. H. The Ty1 integrase protein can exploit the classical nuclear protein import machinery for entry into the nucleus. *Nucleic Acids Res* **36**, 4317-4326, doi:10.1093/nar/gkn383 (2008).
- 25 Kenna, M. A., Brachmann, C. B., Devine, S. E. & Boeke, J. D. Invading the yeast nucleus: a nuclear localization signal at the C terminus of Ty1 integrase is required for transposition in vivo. *Mol Cell Biol* **18**, 1115-1124 (1998).
- 26 Kamiyama, D. *et al.* Versatile protein tagging in cells with split fluorescent protein. *Nat Commun* **7**, 11046, doi:10.1038/ncomms11046 (2016).
- 27 Feng, S. *et al.* Improved split fluorescent proteins for endogenous protein labeling. *Nat Commun* **8**, 370, doi:10.1038/s41467-017-00494-8 (2017).
- 28 Pedelacq, J. D., Cabantous, S., Tran, T., Terwilliger, T. C. & Waldo, G. S. Engineering and characterization of a superfolder green fluorescent protein. *Nat Biotechnol* **24**, 79-88, doi:10.1038/nbt1172 (2006).
- 29 O'Brien, K., Matlin, A. J., Lowell, A. M. & Moore, M. J. The biflavonoid isoginkgetin is a general inhibitor of Pre-mRNA splicing. *J Biol Chem* **283**, 33147-33154, doi:10.1074/jbc.M805556200 (2008).
- 30 Jin, Y. & Bian, T. Nontemplated nucleotide addition prior to polyadenylation: a comparison of Arabidopsis cDNA and genomic sequences. *RNA* **10**, 1695-1697, doi:10.1261/rna.7610404 (2004).
- 31 Horton, J. D., Goldstein, J. L. & Brown, M. S. SREBPs: activators of the complete program of cholesterol and fatty acid synthesis in the liver. *J Clin Invest* **109**, 1125-1131, doi:10.1172/JCI15593 (2002).

- 32 Brown, M. S. & Goldstein, J. L. The SREBP pathway: regulation of cholesterol metabolism by proteolysis of a membrane-bound transcription factor. *Cell* **89**, 331-340 (1997).
- 33 Brown, M. S., Ye, J., Rawson, R. B. & Goldstein, J. L. Regulated intramembrane proteolysis: a control mechanism conserved from bacteria to humans. *Cell* **100**, 391-398 (2000).
- 34 Kim, H. & Lee, Y. Interaction of poly(A) polymerase with the 25-kDa subunit of cleavage factor I. *Biochem Biophys Res Commun* **289**, 513-518, doi:10.1006/bbrc.2001.5992 (2001).
- 35 Brumbaugh, J. *et al.* Nudt21 Controls Cell Fate by Connecting Alternative Polyadenylation to Chromatin Signaling. *Cell* **172**, 106-120 e121, doi:10.1016/j.cell.2017.11.023 (2018).
- 36 Sartini, B. L., Wang, H., Wang, W., Millette, C. F. & Kilpatrick, D. L. Pre-messenger RNA cleavage factor I (CFIm): potential role in alternative polyadenylation during spermatogenesis. *Biol Reprod* **78**, 472-482, doi:10.1095/biolreprod.107.064774 (2008).
- 37 Levitt, N., Briggs, D., Gil, A. & Proudfoot, N. J. Definition of an efficient synthetic poly(A) site. *Genes Dev* **3**, 1019-1025 (1989).
- 38 Anderson, K. M. *et al.* Transcription of the non-coding RNA upperhand controls Hand2 expression and heart development. *Nature* **539**, 433-436, doi:10.1038/nature20128 (2016).
- 39 Joung, J. *et al.* Genome-scale activation screen identifies a lncRNA locus regulating a gene neighbourhood. *Nature* **548**, 343-346, doi:10.1038/nature23451 (2017).
- 40 Engreitz, J. M. *et al.* Local regulation of gene expression by lncRNA promoters, transcription and splicing. *Nature* **539**, 452-455, doi:10.1038/nature20149 (2016).
- 41 Rinn, J. L. & Chang, H. Y. Genome regulation by long noncoding RNAs. *Annu Rev Biochem* **81**, 145-166, doi:10.1146/annurev-biochem-051410-092902 (2012).

- 42 Higgs, D. R. *et al.* Alpha-thalassaemia caused by a polyadenylation signal mutation. *Nature* **306**, 398-400 (1983).
- 43 Orkin, S. H., Cheng, T. C., Antonarakis, S. E. & Kazazian, H. H., Jr. Thalassemia due to a mutation in the cleavage-polyadenylation signal of the human beta-globin gene. *EMBO J* **4**, 453-456 (1985).
- 44 Rund, D. *et al.* Two mutations in the beta-globin polyadenylation signal reveal extended transcripts and new RNA polyadenylation sites. *Proc Natl Acad Sci U S A* **89**, 4324-4328 (1992).

## ACKNOWLEDGEMENTS

We thank Dr. Lynne Maquat for comments on the manuscript and Leisha Manchin for technical assistance. pC0043-PspCas13b crRNA backbone was a gift from Feng Zhang (Addgene plasmid # 103854; <http://n2t.net/addgene:103854> ; RRID:Addgene\_103854). pC0049-EF1a-dPSPCas13b-NES-HIV, H133A/H1058A was a gift from Feng Zhang (Addgene plasmid # 103865; <http://n2t.net/addgene:103865> ; RRID:Addgene\_103865).

## AUTHOR CONTRIBUTIONS

K.M.A. and D.M.A. designed the experiments. K.M.A., P.P., S.R.L and D.M.A performed the experiments and analyzed data. K.M.A. and D.M.A generated the figures and wrote the manuscript.

## AUTHOR INFORMATION

The authors declare no competing financial interests. Correspondence and requests for materials should be addressed to D.M.A. ([doug\\_anderson@urmc.rochester.edu](mailto:doug_anderson@urmc.rochester.edu)).

## FIGURE LEGENDS

**Figure 1** Design and expression of fusion proteins encoding catalytically dead Cas13 and human polyadenylation complex factors. **(a)** Diagram of the vectors encoding fusions between catalytically dead PspCas13b and components of the mammalian polyadenylation supercomplex, CPSF30, WDR33, and NUDT21. F – 3xFLAG epitope; NLS – Ty1 nuclear localization sequence; pA – SV40 polyadenylation sequence. **(b)** Immunohistochemistry using a primary anti-FLAG antibody and an Alexa488 conjugated secondary antibody detecting the nuclear localization of the dPspCas13b fusion proteins expressed in mammalian COS7 cells. Scale bars, 10  $\mu$ m. Results are representative of 3 independently performed experiments.

**Figure 2** Design and Generation of a Fluorescent Reporter for RNA Cleavage and Polyadenylation in Mammalian Cells. **(a)** Diagram of the sfGFP<sub>papa</sub> reporter gene. **(b)** The green fluorescent protein superfolder GFP (sfGFP) forms a beta barrel composed of 11 beta strands. Removal of the 11<sup>th</sup> beta strand abolishes fluorescence. **(c)** Transcription of the sfGFP<sub>papa</sub> reporter and processing of the resulting transcript removes the coding sequence of the 11<sup>th</sup> sfGFP beta strand. **(d)** Removal results in a lack of fluorescent signal in mammalian cells. **(e)** Diagram of the sfGFP<sub>papa</sub>-pA reporter plasmid, which contains an upstream polyadenylation sequence. **(f)** sfGFP can tolerate linker sequences between the 10<sup>th</sup> and 11<sup>th</sup> beta strands without abolishing fluorescence. **(g)** Transcription of the sfGFP<sub>papa</sub>-pA reporter and processing of the resulting transcript. **(h)** Processed transcripts result in robust green fluorescence due to



translation of the sfGFP(1-10)-L-(11) functional open reading frame. Scale bars in (d) and (h), 100  $\mu$ m. Results are representative of 3 independently performed experiments.

**Figure 3** CRISPR-Cas13-mediated Cleavage and Polyadenylation of a Reporter mRNA in Mammalian Cells. (a) Diagram showing the *Postscriptr* targeting strategy to induce alternative cleavage and polyadenylation of the sfGFP<sub>Papa</sub> reporter construct. A crRNA was designed to target an intronic sequence downstream of the coding sequence of the 11<sup>th</sup> beta strand of sfGFP. (b) Expression of the dPspCas13b-NUDT21 fusion protein and intronic targeting crRNA resulted in green fluorescent cells after 24 hours. (c) 3'RACE products amplified from cells expressing dPspCas13b-NUDT21 fusion protein and non-targeting control or intronic targeting crRNA. (d,e) Sequences of the five most proximal 3'RACE products relative to the crRNA target site. Please see Table 1 for complete list of 3'RACE sequences. Green underlined and lowercase nucleotides highlight 3' non-templated nucleotide addition. (f) Nucleotide frequencies at *Postscriptr*-mediated cleavage and polyadenylation sites.

**Figure 4** *Postscriptr*-mediated Alternative Cleavage and Polyadenylation of human SREBP1 in HEK293T cells. (a) Diagram of the SREBP1 maturation pathway. (b) The human SREBP1 locus contains an intronic PAS between exon 7 and exon 8, which results in translation of an SREBP1 $\Delta$  isoform which terminates translation adjacent to the normal S2P cleavage site (c). (d) Diagram of the *Postscriptr*-mediated targeting strategy and sequence of the recovered *Postscriptr*-induced cleaved and polyadenylated transcript (e) and predicted translational stop (f). Quantitative realtime-

PCR (qRT-PCR) gene expression analysis of SREBP1 transcript levels upstream of the crRNA target sequence (**g**), spanning the crRNA target sequence (**h**) and transcript levels of the LDLR gene (**i**) in HEK293T cells targeted with a non-targeted or SREBP1-targeted crRNA.

## FIGURES

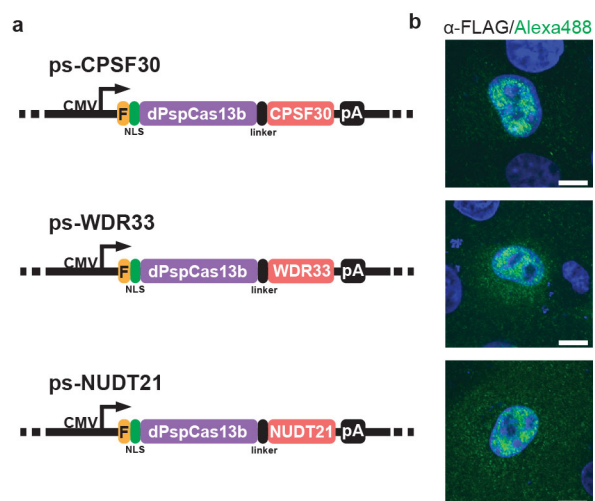

**Figure 1**

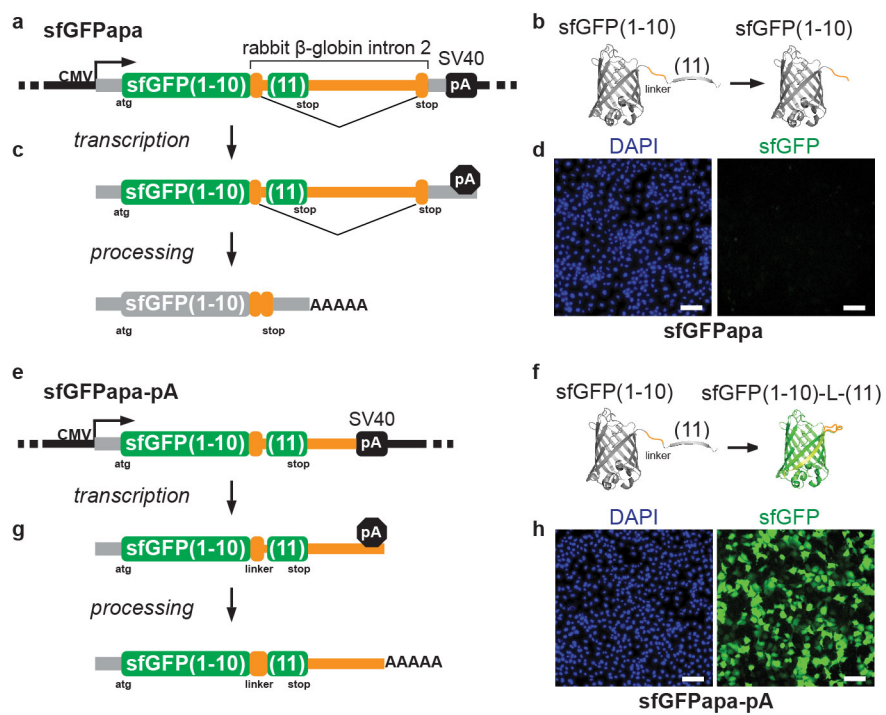

**Figure 2**

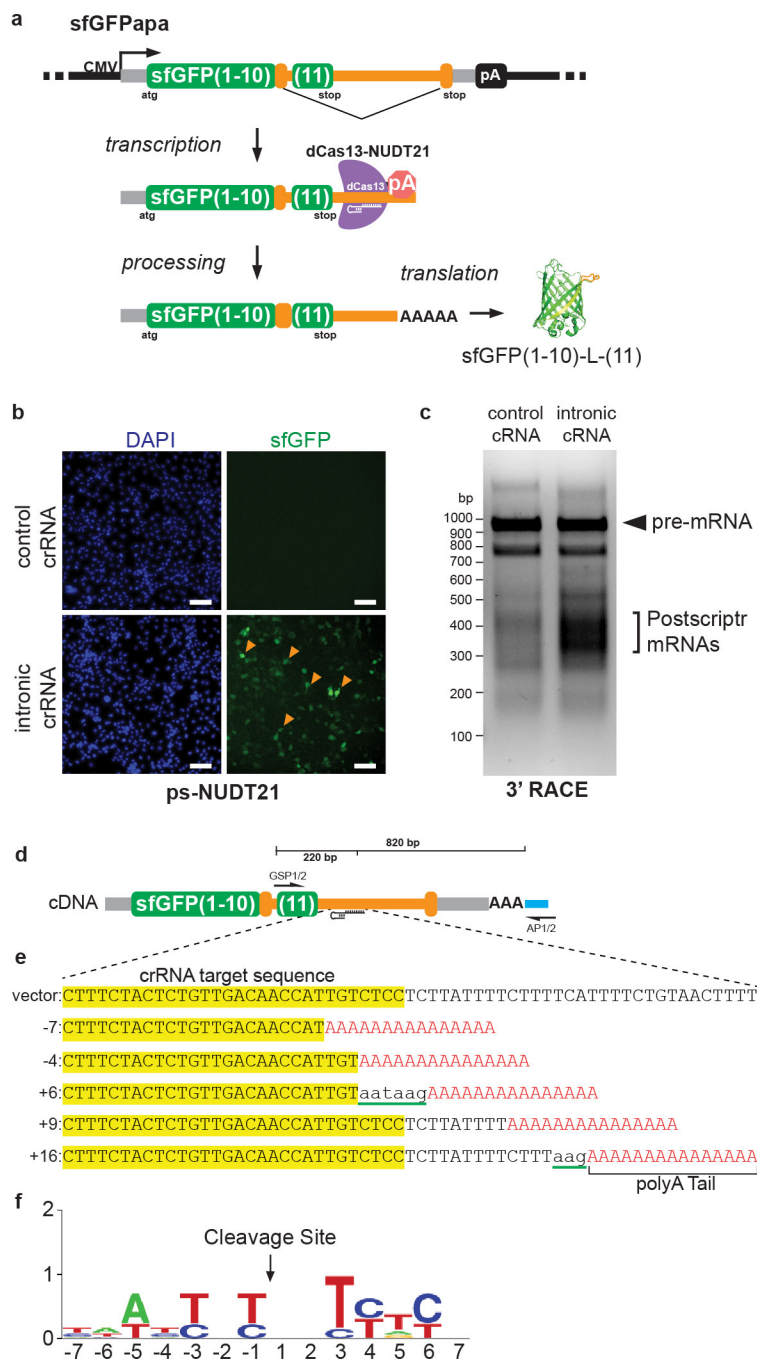

**Figure 3**

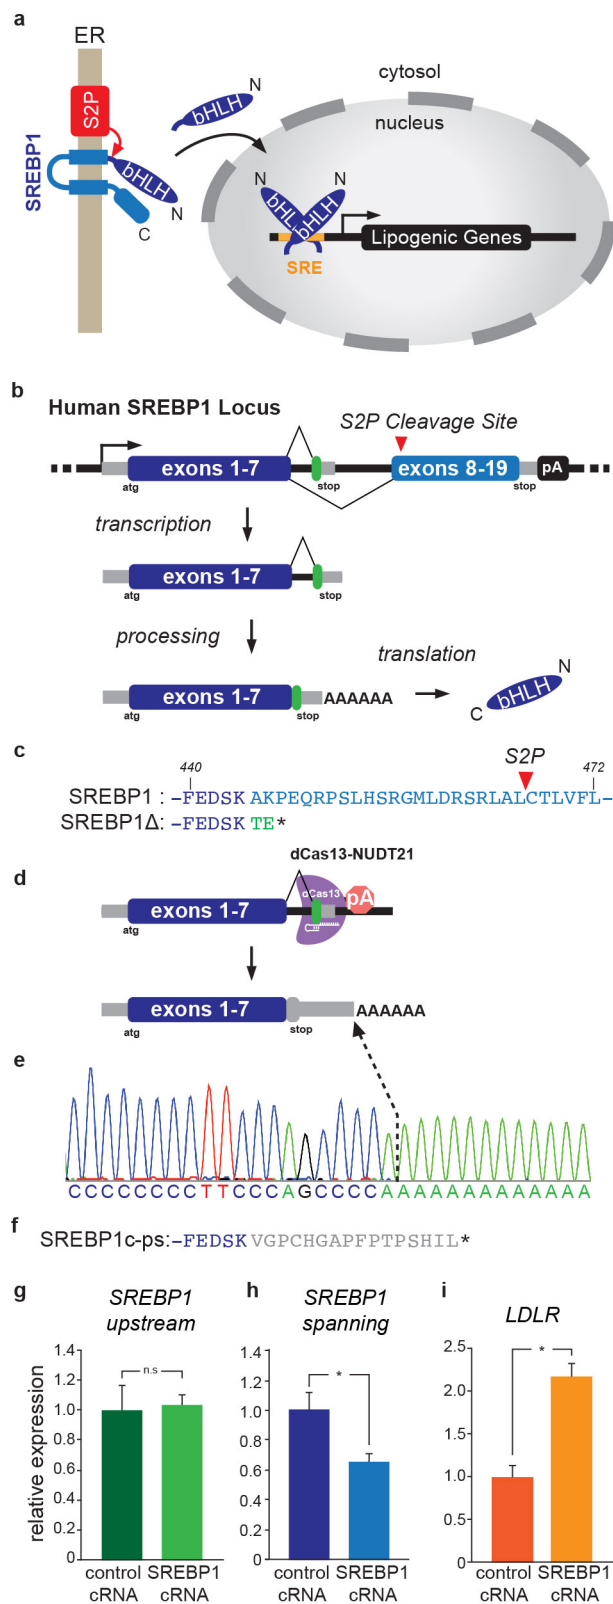

**Figure 4**

## METHODS

### **Synthetic DNA and Cloning**

The coding sequences of human CPSF30, WDR33 and NUDT21 were designed and synthesized for assembly as gBlocks (IDT, Integrated DNA Technologies) and cloned as C-terminal fusions to dPspCas13b into a modified version of the CS2 mammalian expression vector containing a 5' T7 promoter (CSX). The sfGFP<sub>Papa</sub> reporter was designed and synthesized as two separate gBlock gene fragments and subcloned into the CS2 mammalian expression vector. Guide RNAs were designed antisense to pre-mRNA sequences of the sfGFP<sub>Papa</sub> reporter or human *SREPB1* transcripts and were cloned into pC00043<sup>22</sup>. All guide RNAs were designed to be 30 nts in length and start with a 5' G. All plasmid insert sequences were fully verified by Sanger sequencing. Please see Supplementary Table 1 for fusion protein and reporter sequences.

### **Cell Lines, Transient Transfections, and Drug Treatments**

The COS7 cell line was maintained in DMEM supplemented with 10% Fetal Bovine Serum (FBS) with penicillin/streptomycin at 37°C in an atmosphere of 5% CO<sub>2</sub>. Cells were seeded and transiently transfected using Fugene6 (Promega) according to manufacturer's protocol. Twenty-four hours after transfection, cells were either imaged, or treated with DMSO or Isoginkgetin and cultured for an additional 24 hours prior to imaging. For live cell imaging, cells were washed twice with DPBS, counterstained with 10 µg/ml Hoechst 33342 (Invitrogen) in DPBS for 10 minutes at room temperature and imaged on a ZOE Fluorescent Cell Imager (Bio-Rad).

## **Antibodies and Immunohistochemistry**

Transiently transfected COS7 cells were fixed in 4% formaldehyde in PBS for 20 minutes, blocked in 3% Bovine Serum Albumin (BSA) and incubated with primary anti-FLAG (Sigma, F1864) at 1:1000 in 1% BSA for 1 hour at room temperature. Cells were subsequently incubated with an Alexa488 conjugated secondary antibody (Thermofisher) in 1% BSA for 30 minutes at room temperature. Coverslips were mounted using anti-fade fluorescent mounting medium containing DAPI (Vector Biolabs, H-1200) and imaged using confocal microscopy.

## **3' Rapid Amplification of cDNA Ends (3' RACE)**

Transfected cells were washed twice with DPBS and harvested in 1 ml of Trizol to isolate total RNA. RACE compatible cDNA was generated using SuperScript III (Invitrogen) according to manufacturer's protocol, with the exception of the addition of a custom oligo d(T) oligonucleotide containing two 5' nested primer sequences. RACE PCR was performed using two nested target gene specific primers and touchdown PCR protocol as follows: 94°C for 1 minutes (1 cycle); 94°C for 30 seconds, 72°C for 1 minute (5 cycles); 94°C for 30 seconds, 70°C for 4 minutes (5 cycles); 94°C for 20 seconds, 68°C for 1 minute (25 cycles); 72°C for 5 minutes. Please see Supplementary Table 1 for a list of qRT-PCR primers and 3'RACE PCR primers.



## SUPPLEMENTARY DATA

### SUPPLEMENTARY FIGURES

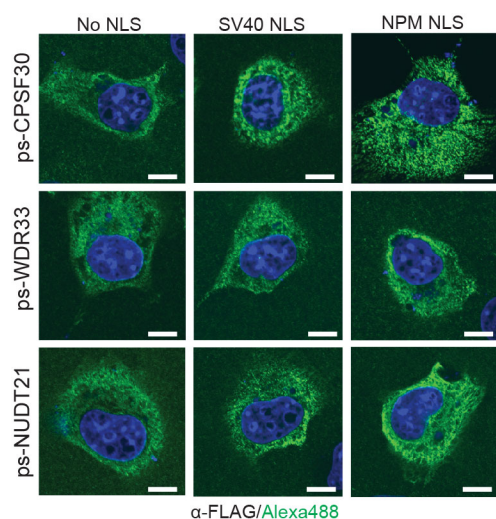

**Supplementary Figure 1** Classic mammalian nuclear localization signals were insufficient to promote nuclear localization of dPspcas13b fusion proteins. Immunohistochemistry using a primary anti-FLAG antibody and secondary Alexa488 conjugated secondary antibody were used to detect the localization of dPspCas13b fusion proteins expressed in mammalian COS7 cells. Fusion proteins contained either no NLS, a classic SV40 NLS or the bipartite NLS from Nucleoplasmin (NPM). Scale bars, 10  $\mu$ m.

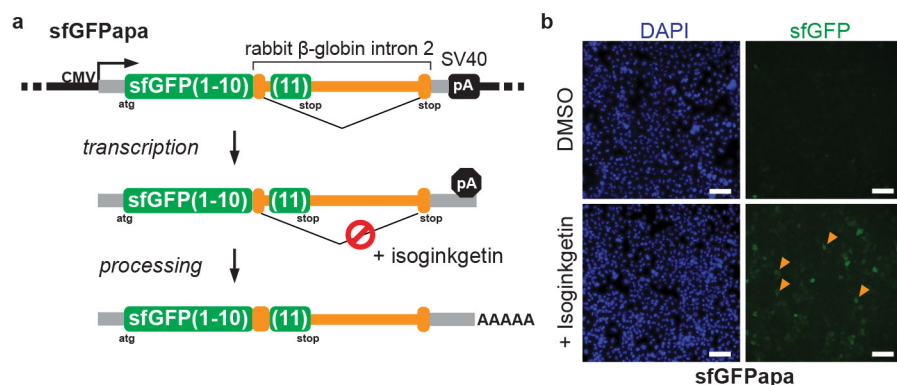

**Supplementary Figure 2** Inhibiting splicing promotes expression of the sfGFP(1-10)-L-(11) open reading frame. **(a)** Diagram of the sfGFP<sub>Papa</sub> reporter and predicted transcription and processing steps resulting from treatment with the splicing inhibitor isoginkgetin. **(b)** COS7 cells transiently transfected with the sfGFP<sub>Papa</sub> reporter for 24 hours were treated with either DMSO or isoginkgetin. Cells treated with isoginkgetin resulted in detectable green fluorescence after 24 hours. Scale bars in **(b)**, 100  $\mu$ m.

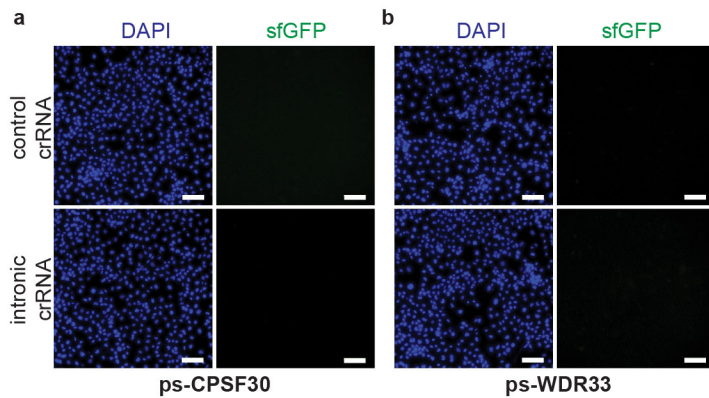

**Supplementary Figure 3** The dPspCas13b fusions to CPSP30 or WDR33 were not sufficient to promote cleavage and polyadenylation of the sfGFP<sub>Papa</sub> reporter mRNA. (a) *Postscriptr* targeting of the sfGFP<sub>Papa</sub> reporter using the dPspCas13b-CPSF30 or (b) – WDR33 fusion proteins using the sfGFP<sub>Papa</sub> intronic-targeting crRNA did not result in detectable green fluorescence relative to a control non-targeting crRNA. Scale bars in (a) and (b), 100  $\mu$ m.

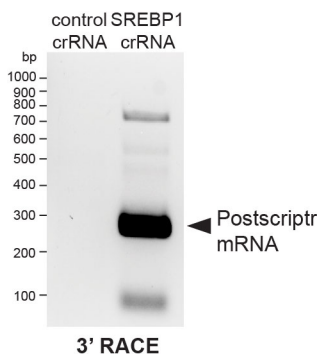

**Supplementary Figure 4** *Postscriptr*-mediated alternative cleavage and polyadenylation of human SREBP1 transcripts. PCR amplified 3'RACE products from cells expressing dPspCas13b-NUDT21 with non-targeting control or *SREBP1*-targeting crRNAs.

## SUPPLEMENTARY TABLE 1: Sequences

### 3' RACE clones isolated from *Postscriptr*-targeted sfGFP<sub>Papa</sub> reporter

**crRNA target site**

```
CTTTCTACTCTGTTGACAACCATTTGCTCCCTTATTTTCTTTTCATTTTCTGTAACCTTTT-41nt-CACTTTGTATTATTGTCAGATTGTAAGTACTTTCTCTAATCACTTTTCTTC
CTTTCTACTCTGTTGACAACCATAAAAAAAAAAAAAAAA
CTTTCTACTCTGTTGACAACCATTTGTAATAAGAAAAAAAAAAAAAAAA
CTTTCTACTCTGTTGACAACCATTTGCTCCCTTATTTTAAAAAAAAAAAAAAAA
CTTTCTACTCTGTTGACAACCATTTGCTCCCTTATTTTCTTTAagAAAAAAAAAAAAAAAA
CTTTCTACTCTGTTGACAACCATTTGCTCCCTTATTTTCTTTTCATTTTCTGcAAAAAAAAAAAAAAAA
CTTTCTACTCTGTTGACAACCATTTGCTCCCTTATTTTCTTcCATTTTCTGTAACCTTTT-41nt-CAAAAAAAAAAAAAAAAA
CTTTCTACTCTGTTGACAACCATTTGCTCCCTTATTTTCTTTTCATTTTCTGTAACCTTTT-41nt-CACAAAAAAAAAAAAAAAA
CTTTCTACTCTGTTGACAACCATTTGCTCCCTTATTTTCTTTTCATTTTCTGTAACCTTTT-41nt-CACTTTGTcAAAAAAAAAAAAAAAA
CTTTCTACTCTGTTGACAACCATTTGCTCCCTTATTTTCTTTTCATTTTCTGTAACCTTTT-41nt-CACTTTGTATcAAAAAAAAAAAAAAAA
CTTTCTACTCTGTTGACAACCATTTGCTCCCTTATTTTCTTTTCATTTTCTGTAACCTTTT-41nt-CACTTTGTATTATTGTCAGATTGTAAGTACTTTCTCTAAAAAAAAAAAAAAAA
```

### PspCas13b crRNA target sequences (cloned into pC0043<sup>22</sup>)

*sfGFP<sub>Papa</sub> intronic crRNA target sequence*  
5' -GGAGACAATGGTTGTCAACAGAGTAGAAAG-3'

*Human SREBP1 intronic PAS crRNA target sequence*  
5' -GGCCTCAGTTATTCTGTCTATGAAATGGGA-3'

### 3' RACE Oligonucleotides

*3' RACE Oligo d(T)*  
5' CCATCCTAATACGACTCACTATAGGGCACTCACTATAGGGCTCGAGCGGCTTTTTTTTTTTTTT  
TTTTVN-3'

*3' RACE Oligo dT Nested Primer 1*  
5' -CCATCCTAATACGACTCACTATAGGGC-3'

*3' RACE Oligo dT Nested Primer 2*  
5' -ACTCACTATAGGGCTCGAGCGGC-3'

*3' RACE SREBP1 Gene Specific Primer 1*  
5' -CCCCTTGTCCTTGGCAGCA-3'

*3' RACE SREBP1 Gene Specific Primer 2*  
5' -AGCGGTGGCAGTGGCAGTGA-3'

*3' RACE sfGFP<sub>Papa</sub> Gene Specific Primer 1*  
5' -TGGGGACCTTCGTGACCACA-3'

*3' RACE sfGFP<sub>Papa</sub> Gene Specific Primer 2*  
5' -TGCTGCTGGGATTACATGATTGTTCTTTC-3'

## qRT-PCR Oligonucleotides

### *SREBP1* (Upstream)

F: 5' –AGCTCAAGGATCTGGTGGTG–3'

R: 5' –GACAGCAGTGCGCAGACTTA–3'

### *SREBP1* (Downstream)

F: 5' –GACAGCCCAGTCTTTGAGGA–3'

R: 5' –CAGGACAGGCAGAGGAAGAC–3'

### *LDLR*

F: 5' –AAGGACACAGCACACAACCA–3'

R: 5' –CTGGGCTTCTTCTCATTTCC–3'

## sfGFP<sub>Papa</sub> reporter

ATGAGCAAAGGAGAAGAACTTTTCACTGGAGTTGTCCCAATTCTTGTTGAATTAGATGGTGATG  
TTAATGGGCACAAATTTTCTGTCCGTGGAGAGGGTGAAGGTGATGCTACAAACGGAAACTCAC  
CCTTAAATTTATTTGCACTACTGGAAAACCTGTTCCATGGCCAACACTTGTCACTACTCTG  
ACCTATGGTGTTCATGCTTTTCCCGTTATCCGGATCACATGAAACGGCATGACTTTTTCAAGA  
GTGCCATGCCCGAAGTTATGTACAGGAACGCACTATATCTTTCAAAGATGACGGGACCTACAA  
GACGCGTGCTGAAGTCAAGTTTGAAGGTGATACCCTTGTTAATCGTATCGAGTTAAAAGGTATT  
GATTTTAAAGAAGATGGAAACATTCTCGGACACAAACTgGAGTACAACCTTTAACTCACACAATG  
TATACATCACGGCAGACAAACAAAAGAATGGAATCAAAGCTAACTTCAAATTCGCCACAACGT  
TGAAGATGGTTCGTTCAACTAGCAGACCATTATCAACAAAATACTCCAATTGGCGATGGCCCT  
GTCCTTTTACCAGACAACCATTACCTGTCGACACAATCTGTCCTTTCGAAAGATCCCAACGAAA  
AGAGGCCTGATCCTGAGAACTTCAGGgtgagtttggggacccttCGTGACCACATGGTCCTTCT  
TGAGTTTGTAACTGCTGCTGGGATTACATGAttgttctttctttttcgctattgtaaaattcat  
gttatatggagggggcaaagttttcagggtgttgtttagaatggggtcttctcgcgaggaagacc  
tggaagatgtcccttgatcaccatggaccctcatgataattttgtttctttcactttctactc  
tgttgacaaccattgtctcctcttattttcttttcattttctgtaactttttcgttaaacttta  
gcttgcaatttgtaacgaatttttaaatcacttttgtttatttgtcagattgtaagtactttct  
ctaatacactttttttcaaggcaatcagggtatattatattgtacttcagcacagtttttagaga  
acaattgttataattaaatgataaggtagaatatttctgcatataaattctggctggcgtggaa  
atattcttattggtagaacaactacatcctggatcatcctgcctttctctttatggttaca  
atgatatacactgtttgagatgaggataaaaatactctgagtccaaaccgggcccctctgctaac  
catgttcatgccttctttctttttctctacagCTCCTGGGCAACGTGCTGGTTATTGTGCTGTCTC  
ATCATTTTGGCAAAGAATAATAA

## sfGFP(1-10)

MSKGEELFTGVVPIVLVDGDVNGHKFSVRGEGEGDATNGKLLKFICTTGKLPVPWPTLVTTL  
TYGVQCFSRYPDHMKRHDFFKSAMPEGYVQERTISFKDDGTYKTRAEVKFEGDTLVNRIELKGI  
DFKEDGNILGHKLEYNFNSHNVYITADKQKNGIKANFKIRHNVEDGSVQLADHYQQNTPIGDGP  
VLLPDNHYLSTQSVLSKDPNEKRDPENFRLLGNVLVIVLSHHFGKE\*\*

sfGFP(1-10)-L-(11)

MSKGEELFTGVVPIVLVELDGDVNGHKFSVRGEGEGDATNGKLLKFICTTGKLPVPWPTLVTTL  
TYGVQCFSRYPDHMKRHDFFKSAMPEGYVQERTISFKDDGTYKTRAEVKFEGDTLVNRIELKGI  
DFKEDGNILGHKLEYNFNHNVYITADKQKNGIKANFKIRHNVEDGSVQLADHYQQNTPIGDGP  
VLLPDNHYLSTQSVLSKDPNEKRPDPENFRVSLGTLRDHMLLEFVTAAGIT\*

## dPspCas13b fusion protein sequences

### ps-CPSF30

#### 3xFLAG-Ty1NLS-dPspCas13b-linker-CPSF30

ATGGACTACAAAGACCATGACGGTGATTATAAAGATCATGACATCGATTACAAGGATGACGATG  
ACAAGGGCGGAAACTCAAAGAAAAGGTCACTGGAGGACAACGAAACGGAAATCAAAGTCTCCAG  
AGACACCTGGAACACTAAGAACATGCGGTCCCTGGAACCGCCACGAAGCAAGAAACGGATACAT  
GGAGGCAACATCCCCGCTCTGGTGGAAAACCAGAAGAAGTACTTTGGCACCTACAGCGTGATGG  
CCATGCTGAACGCTCAGACCGTGCTGGACCACATCCAGAAGGTGGCCGATATTGAGGGCGAGCA  
GAACGAGAACAACGAGAATCTGTGGTTTCACCCCGTGATGAGCCACCTGTACAACGCCAAGAAC  
GGCTACGACAAGCAGCCGAGAAAACCATGTTTCATCATCGAGCGGCTGCAGAGCTACTTCCCAT  
TCCTGAAGATCATGGCCGAGAACCAGAGAGAGTACAGCAACGGCAAGTACAAGCAGAACCAGCGT  
GGAAGTGAACAGCAACGACATCTTCGAGGTGCTGAAGCGCGCCTTCGGCGTGCTGAAGATGTAC  
AGGGACCTGACCAACGCATACAAGACCTACGAGGAAAAGCTGAACGACGGCTGCGAGTTCCTGA  
CCAGCACAGAGCAACCTCTGAGCGGCATGATCAACAATACTACACAGTGGCCCTGCGGAACAT  
GAACGAGAGATACGGCTACAAGACAGAGGACCTGGCCTTCATCCAGGACAAGCGGTTCAAGTTC  
GTGAAGGACGCTACGGCAAGAAAAGTCCCAAGTGAATACCGGATTCTTCCTGAGCCTGCAGG  
ACTACAACGGCGACACACAGAAGAAGCTGCACCTGAGCGGAGTGGGAATCGCCCTGCTGATCTG  
CCTGTTCTTGACAAGCAGTACATCAACATCTTTCTGAGCAGGCTGCCCATCTTCTCCAGCTAC  
AATGCCCAGAGCGAGGAACGGCGGATCATCATCAGATCCTTCGGCATCAACAGCATCAAGCTGC  
CCAAGGACCGGATCCACAGCGAGAAGTCCAACAAGAGCGTGGCCATGGATATGCTCAACGAAGT  
GAAGCGGTGCCCCGACGAGCTGTTCAACAACACTGTCTGCCGAGAAGCAGTCCCGGTTGAGAATC  
ATCAGCGACGACCACAATGAAGTGCTGATGAAGCGGAGCAGCGACAGATTCGTGCCTCTGCTGC  
TGCAGTATATCGATTACGGCAAGCTGTTTCGACCACATCAGGTTCCACGTGAACATGGGCAAGCT  
GAGATACCTGCTGAAGGCCGACAAGACCTGCATCGACGGCCAGACCAGAGTCAGAGTGATCGAG  
CAGCCCCGTAACGGCTTCGGCAGACTGGAAGAGGCCGAGACAATGCGGAAGCAAGAGAACGGCA  
CCTTCGGCAACAGCGGCATCCGGATCAGAGACTTCGAGAACATGAAGCGGGACGACGCCAATCC  
TGCCAACTATCCCTACATCGTGGACACCTACACACACTACATCCTGGAAAACAACAAGGTCGAG  
ATGTTTATCAACGACAAAGAGGACAGCGCCCCACTGCTGCCCGTGATCGAGGATGATAGATACG  
TGGTCAAGACAATCCCAGCTGCCGGATGAGCACCTGGAAATTCAGCCATGGCCTTCCACAT  
GTTTCTGTTTCGGCAGCAAGAAAACCGAGAAGCTGATCGTGGACGTGCACAACCGGTACAAGAGA  
CTGTTCCAGGCCATGCAGAAAGAAGAAGTGACCGCCGAGAATATCGCCAGCTTCGGAATCGCCG  
AGAGCGACCTGCCTCAGAAGATCCTGGATCTGATCAGCGGCAATGCCACGGCAAGGATGTGGA  
CGCCTTCATCAGACTGACCGTGGACGACATGCTGACCGACACCGAGCGGAGAATCAAGAGATTC  
AAGGACGACCGGAAGTCCATTCGGAGCGCCGACAACAAGATGGGAAAGAGAGGCTTCAAGCAGA  
TCTCCACAGGCAAGCTGGCCGACTTCTGGCCAAGGACATCGTGCTGTTTCAGCCCAGCGTGAA  
CGATGGCGAGAACAAGATCACCGGCCTGAACTACCGGATCATGCAGAGCGCCATTGCCGTGTAC  
GATAGCGGCGACGATTACGAGGCCAAGCAGCAGTTCAGCTGATGTTTCGAGAAGGCCCGGCTGA

TCGGCAAGGGCACAAACAGAGCCTCATCCATTTCTGTACAAGGTGTTTCGCCCGCAGCATCCCCGC  
CAATGCCGTCGAGTTCTACGAGCGCTACCTGATCGAGCGGAAGTTCTACCTGACCGGCCTGTCC  
AACGAGATCAAGAAAGGCAACAGAGTGGATGTGCCCTTCATCCGGCGGGACCAGAACAAGTGGA  
AAACACCCGCCATGAAGACCCTGGGCAGAATCTACAGCGAGGATCTGCCCGTGGAAGTCCCAG  
ACAGATGTTTCGACAATGAGATCAAGTCCCACCTGAAGTCCCTGCCACAGATGGAAGGCATCGAC  
TTCAACAATGCCAACGTGACCTATCTGATCGCCGAGTACATGAAGAGAGTGCTGGACGACGACT  
TCCAGACCTTCTACCAGTGAACCGCAACTACCGGTACATGGACATGCTTAAGGGCGAGTACGA  
CAGAAAGGGCTCCCTGCAGCACTGCTTACCAGCGTGAAGAGAGAGAAGGCCTCTGGAAAGAG  
CGGGCCTCCAGAACAGAGCGGTACAGAAAGCAGGCCAGCAACAAGATCCGCAGCAACCGGCAGA  
TGAGAAACGCCAGCAGCGAAGAGATCGAGACAATCCTGGATAAGCGGCTGAGCAACAGCCGGAA  
CGAGTACCAGAAAAGCGAGAAAGTATCCGGCGCTACAGAGTGCAGGATGCCCTGCTGTTTCTG  
CTGGCCAAAAGACCCTGACCGAACTGGCCGATTTGACGGCGAGAGGTTCAAAGTAAAGAAA  
TCATGCCCGACGCCGAGAAGGGAATCCTGAGCGAGATCATGCCCATGAGCTTACCTTCGAGAA  
AGGCGGCAAGAAGTACACCATCACCAGCGAGGGCATGAAGCTGAAGAACTACGGCGACTTCTTT  
GTGCTGGCTAGCGACAAGAGGATCGGCAACCTGCTGGAAGTCTGTTGGCAGCGACATCGTGTCCA  
AAGAGGATATCATGGAAGAGTTCAACAAATACGACCAGTGCAGGCCCGAGATCAGCTCCATCGT  
GTTCAACCTGAAAAGTGGGCCTTCGACACATACCCCGAGCTGTCTGCCAGAGTGGACCGGGAA  
GAGAAGGTGGACTTCAAGAGCATCCTGAAAATCCTGCTGAACAACAAGAACATCAACAAAGAGC  
AGAGCGACATCCTGCGGAAGATCCGGAACGCCTTCGATGCAAACAATTACCCCGACAAAGGCGT  
GGTGGAAATCAAGGCCCTGCCTGAGATCGCCATGAGCATCAAGAAGGCCTTTGGGGAGTACGCC  
ATCATGAAGTCGCGAGGCGGTGGAGGTAGTGGAGGGGGAGGATCAACGCGTCAGGAAATCATCG  
CCAGCGTGGACCACATCAAGTTTGACTTGGAGATCGCGGTGGAGCAGCAGCTGGGGGCGCAGCC  
GCTGCCCTTCCCCGGCATGGACAAGTCGGGCGCTGCTGTCTGTGAATTCTTTTTGAAAGCTGCC  
TGCGGCAAAGGGGGCATGTGTCCGTTTTGCCACATCAGTGGTGAGAAAACAGTTGTGTGCAAAC  
ACTGGCTGCGTGGCCTATGCAAGAAAGGGGACCAGTGTGAGTTCCTGCATGAGTATGACATGAC  
CAAGATGCCCCGAGTGCTACTTCTACTCCAAGTTCGGGGAGTGCAGCAACAAGGAATGTCCCTTC  
CTGCACATCGACCCCGAGTCCAAGATCAAGGACTGTCCTTGGTATGACCGTGGCTTCTGCAAGC  
ACGGTCCCCTCTGCAGGCACCGGCACACACGGAGAGTCATCTGTGTGAATTACCTCGTGGGATT  
CTGCCCGGAGGGGCCCTCGTGTAATTCATGCACCCTCGATTTGAACTGCCCATGGGAACCACC  
GAGCAGCCCCACTGCCGAGCAGACACAGCCTCCAGCAAAGCAGAGAACCCCGCAGGTCATCG  
GGGTATGCAGAGTCAAACAGCAGCGCGGGCAACCGGGGACCCCGGCCACTGGAGCAGGTCAC  
CTGTTACAAGTGTGGCGAGAAAGGACACTACGCCAACAGATGCACCAAAGGGCACTTGGCCTTT  
CTCAGTGGACAGTAGTAA

**3xFLAG-Ty1NLS-dPspCas13b-linker-CPSF30**

**MDYKDHDGDYKDHDIDYKDDDDKGGNSKKRSLDNETEIKVSRDTWNTKNMRSLEPPRSKKRIH**  
GGNIPALVENQKKYFGTYSVMAMLNAQTVLDHIQKVADIEGEQNENNENLWFHPVMSHLYNAKN  
GYDKQPEKTMFIIERLQSYFPFLKIMAENQREYSNGKYQNRVEVNSNDIFEVLKRAFGVLKMY  
RDLTNAYKTYEEKLNDGCEFLTSTEQPLSGMINNYTVALRNMNERYGKTEDLAFIQDKRFKF  
VKDAYGKKKSQVNTGFFLSLQDYNGDTQKKLHLSGVGIALLICLFLDKQYINIFLSRLPIFSSY  
NAQSEERRIIIRSFINSIKLPKDRIHSEKSNKSVAMDMLNEVKRCPDELFTTSAEKQSRFRI  
ISDDHNEVLMKRSSDRFVPLLLQYIDYGKLFDHIRFVNMGLRYLLKADKTCIDGQTRVRVIE  
QPLNGFGRLEEAETMRKQENGTFGNSGIRIRDFENMKRDDANPANYPIVDYTHYILENNKVE  
MFINDKEDSAPLLPVIEDDRYVVKTIIPSCRMSTLEIPAMAFHMFLFGSKKTEKLIVDVHNRYKR  
LFQAMQKEEVTAENIASFGIAESDLPQKILDLISGNAHGKDVDAFIRLTVDDMLTDTERRIKRF  
KDDRKSIRSADNKMGRGFKQISTGKLADFLAKDIVLFQPSVNDGENKITGLNYRIMQSAIAVY

DSGDDYEAKQQFKLMFEKARLIGKGTTEPHPLYKVFARSIPANAVEFYERYLIERKFYLTGLS  
NEIKKGNRVDVPFIRRDQNKWKTPAMKTLGRIYSEDLVELPRQMFNEIKSHLKS LPQMEGID  
FNNANVTYLIAEYMKRVLDDDFQTFYQWNRNYRYMDMLKGEYDRKGS LQHCFTSVEEREGLWKE  
RASRTERYRKQASNKIRSNRQMRNASSEIEIETILDKRLSNSRNEYQKSEKVI RRYRVQDALLFL  
LAKKTLTELADFDGERFKLKEIMPDAEKILSEIMPMSFTFEKGGK KYTITSEGMLKKNYGDFF  
VLASDKRIGNLLELVGSDIVSKEDIMEEFNKYDQCRPEISSIVFNLEK WAFDTYPELSARVDRE  
EKVDFKSILKILLNNKNINKEQSDILRKIRNAFDANNYPDKGVVEIKALPEIAMS IKKAFGEYA  
IMKSRGGGGSGGGGSTRQEIIASVDHIKFDLEIAVEQQLGAQPLPFP GMDKSGAAVCEFFLKAA  
CGKGGMCPFRHISGEKTVVCKHWLRGLCKKGDQCEFLHEYDMTKMPECYFYSKFGECSNKECPF  
LHIDPESKIKDCPWYDRGFCKHGPLCRHRHTRRVI CVNYLVGFCPEGPSCKFMHPRFELPMGTT  
EQPPLPQQTQPPAKQRTPVIGVMQSQNSSAGNRGPRPLEQVTCYKCGEKGHYANRCKGHLAF  
LSGQ\*\*

### ps-WDR33

#### 3xFLAG-Ty1NLS-dPspCas13b-linker-WDR33

ATGGACTACAAAGACCATGACGGTGATTATAAAGATCATGACATCGATTACAAGGATGACGATG  
ACAAGGGCGGAAACTCAAAGAAAAGGTCACTGGAGGACAACGAAACGGAATCAAAGTCTCCAG  
AGACACCTGGAACACTAAGAACATGCGGTCCCTGGAACCGCCACGAAGCAAGAAACGGATACAT  
GGAGGCAACATCCCCGCTCTGGTGGAAAAC CAGAAGAAGTACTTTGGCACCTACAGCGTGATGG  
CCATGCTGAACGCTCAGACCGTGCTGGACCACATCCAGAAGGTGGCCGATATTGAGGGCGAGCA  
GAACGAGAACAACGAGAATCTGTGGTTTCACCCCGTGATGAGCCACCTGTACAACGCCAAGAAC  
GGCTACGACAAGCAGCCCAGAAAACCATGTT CATCATCGAGCGGCTGCAGAGCTACTTCCCAT  
TCCTGAAGATCATGGCCGAGAACCAGAGAGAGTACAGCAACGGCAAGTACAAGCAGAACC GCGT  
GGAAGTGAACAGCAACGACATCTTCGAGGTGCTGAAGCGCGCCTTCGGCGTGCTGAAGATGTAC  
AGGGACCTGACCAACGCATACAAGACCTACGAGGAAAAGCTGAACGACGGCTGCGAGTTCCTGA  
CCAGCACAGAGCAACCTCTGAGCGGCATGATCAACA ACTACTACACAGTGGCCCTGCGGAACAT  
GAACGAGAGATACGGCTACAAGACAGAGGACCTGGCCTT CATCCAGGACAAGCGGTTCAAGTTC  
GTGAAGGACGCTACGGCAAGAAAAGTCCCAAGTGAATACCGGATTCTTCTGAGCCTGCAGG  
ACTACAACGGCGACACACAGAAGAAGCTGCACCTGAGCGGAGTGGGAATCGCCCTGCTGATCTG  
CCTGTTCTTGACAAGCAGTACATCAACATCTTTCTGAGCAGGCTGCCCATCTTCTCCAGCTAC  
AATGCCCAGAGCGAGGAACGGCGGATCATCATCAGATCCTTCGGCATCAACAGCATCAAGCTGC  
CCAAGGACCGGATCCACAGCGAGAAGTCCAACAAGAGCGTGGCCATGGATATGCTCAACGAAGT  
GAAGCGGTGCCCCGACGAGCTGTTCAACAAC TGTCTGCCGAGAAGCAGTCCCGGTT CAGAATC  
ATCAGCGACGACCACAATGAAGTGCTGATGAAGCGGAGCAGCGACAGATTCGTGCCTCTGCTGC  
TGCAGTATATCGATTACGGCAAGCTGTT CGACCACATCAGGTTCCACGTGAACATGGGCAAGCT  
GAGATACCTGCTGAAGGCCGACAAGACCTGCATCGACGGCCAGACCAGAGTCAGAGTGATCGAG  
CAGCCCCTGAACGGCTTCGGCAGACTGGAAGAGGCCGAGACAATGCGGAAGCAAGAGAACGGCA  
CCTTCGGCAACAGCGGCATCCGGATCAGAGACTTCGAGAACATGAAGCGGGACGACGCCAATCC  
TGCCAACTATCCCTACATCGTGGACACCTACACACACTACATCTGGAAAACAACAAGGTCGAG  
ATGTTTATCAACGACAAAGAGGACAGCGCCCCACTGCTGCCCGTGATCGAGGATGATAGATACG  
TGGTCAAGACAATCCCAGCTGCCGGATGAGCACCTGGAAATTCAGCCATGGCCTTCCACAT  
GTTTCTGTTCCGGCAGCAAGAAAACCGAGAAGCTGATCGTGGACGTGCACAACCGGTACAAGAGA  
CTGTTCCAGGCCATGCAGAAAGAAGAAGTGACCGCCGAGAATATCGCCAGCTTCGGAATCGCCG  
AGAGCGACCTGCCTCAGAAGATCCTGGATCTGATCAGCGGCAATGCCACGGCAAGGATGTGGA



CGCCTTCATCAGACTGACCGTGGACGACATGCTGACCGACACCGAGCGGAGAATCAAGAGATTC  
AAGGACGACCGGAAGTCCATTCGGAGCGCCGACAACAAGATGGGAAAGAGAGGCTTCAAGCAGA  
TCTCCACAGGCAAGCTGGCCGACTTCTGGCCAAGGACATCGTGCTGTTTTAGCCCAGCGTGAA  
CGATGGCGAGAACAAGATCACCGGCCTGAACTACCGGATCATGCAGAGCGCCATTGCCGTGTAC  
GATAGCGGCGACGATTACGAGGCCAAGCAGCAGTTCAAGCTGATGTTTCGAGAAGGCCCGGCTGA  
TCGGCAAGGGCACAACAGAGCCTCATCCATTTCTGTACAAGGTGTTTCGCCCGCAGCATCCCCGC  
CAATGCCGTGAGTTCTACGAGCGCTACCTGATCGAGCGGAAGTTCTACCTGACCGGCCTGTCC  
AACGAGATCAAGAAAGGCAACAGAGTGGATGTGCCCTTCATCCGGCGGGACCAGAACAAGTGGA  
AAACACCCGCCATGAAGACCCTGGGCAGAATCTACAGCGAGGATCTGCCCGTGGAAGTGGCCAG  
ACAGATGTTTCGACAATGAGATCAAGTCCCACCTGAAGTCCCTGCCACAGATGGAAGGCATCGAC  
TTCAACAATGCCAACGTGACCTATCTGATCGCCGAGTACATGAAGAGAGTGTGGACGACGACT  
TCCAGACCTTCTACCAGTGGAAACCGCAACTACCGGTACATGGACATGCTTAAGGGCGAGTACGA  
CAGAAAGGGCTCCCTGCAGCACTGCTTACCAGCGTGGAAAGAGAGAGAAGGCCTCTGGAAAGAG  
CGGGCCTCCAGAACAGAGCGGTACAGAAAGCAGGCCAGCAACAAGATCCGCAGCAACCGGCAGA  
TGAGAAACGCCAGCAGCGAAGAGATCGAGACAATCCTGGATAAGCGGCTGAGCAACAGCCGGAA  
CGAGTACCAGAAAAGCGAGAAAGTGATCCGGCGCTACAGAGTGCAGGATGCCCTGCTGTTTCTG  
CTGGCCAAAAGACCCTGACCGAACTGGCCGATTTTCGACGGCGAGAGGTTCAAAGTAAAGAAA  
TCATGCCCGACGCCGAGAAGGGAATCCTGAGCGAGATCATGCCCATGAGCTTACCTTCGAGAA  
AGGCGGCAAGAAGTACACCATCACCAGCGAGGGCATGAAGCTGAAGAAGTACGGCGACTTCTTT  
GTGCTGGCTAGCGACAAGAGGATCGGCAACCTGCTGGAAGTCTGTTGGCAGCGACATCGTGTCCA  
AAGAGGATATCATGGAAGAGTTCAACAAATACGACCAGTGCAGGCCCGAGATCAGCTCCATCGT  
GTTCAACCTGGAAAAGTGGGCCTTCGACACATACCCCGAGCTGTCTGCCAGAGTGGACCGGGAA  
GAGAAGGTGGACTTCAAGAGCATCCTGAAAATCCTGCTGAACAACAAGAACATCAACAAAGAGC  
AGAGCGACATCCTGCGGAAGATCCGGAACGCCTTCGATGCAAACAATTACCCCGACAAAGGCGT  
GGTGGAAATCAAGGCCCTGCCTGAGATCGCCATGAGCATCAAGAAGGCCTTTGGGGAGTACGCC  
ATCATGAAGTCGCGAGGCGGTGGAGGTAGTGGAGGGGGAGGATCAACGCGTGGCTCACCCCTC  
GATTCTTCCACATGCCGCGCTTTCAACACCAAGCCCCAGGCCAACTCTTTTACAAACGCCCAGA  
CTTTGCGCAGCAGCAGGCGATGCAGCAGCTTACTTTTCGACGGAAAGCGCATGCGAAAAGCGGTC  
AACCAGCAAGACAATAGATTACAATCCCAGTGTCAATTAATACCTCGAGAATCGCATATGGCAA  
GAGATCAACGAGACATGAGAGCCATTCAACCGGATGCAGGTTATTACAATGATCTGGTCCCTCC  
GATCGGCATGTTGAATAATCCAATGAACGCTGTCACGACCAAATTTGTCCGCACAAGTACTAAT  
AAGTTAAATGCCAGTATTTGTAGTGCAGTGGACACCCGAAGGAAGGAGGCTCGTCACAGGAG  
CATCTTCCGGTGAATTTACTCTGTGGAATGGATTGACATTTAATTTTGAACAATACTTTCAGGC  
CCATGACTCTCCGGTGGAGGCCATGACCTGGTCCACAACGACATGTGGATGCTGACCGCAGAC  
CATGGTGGGTATGTAAAATACTGGCAGTCAAACATGAATAATGTGAAGATGTTTCAGGCCATA  
AGAAGCTATACGGGAGGCTTCTTTTTCACCAACTGATAATAAGTTCGCCACCTGTTTCAGACGA  
TGGTACGGTCCGCATTTGGGATTTTCTCCGATGTGATGAGGAGAGAATACTGAGGGGTACGGA  
GCCGATGTCAAATGTGTGGACTGGCATCCAACCAAGGGTCTTGTGCTTTCAGGCTCCAAAGATT  
CCAACAGCCGATTAAGTTTTGGGACCCTAAAACCGGACAATCCCTGGCGACACTGCATGCCCA  
TAAGAACACGGTCATGGAAGTCAAGCTCAATCTTAATGGGAATTGGCTGCTCACGGCTTCTCGG  
GACCACCTTTGCAAGCTGTTTCGATATTAGAAATTTGAAAGAAGAACTGCAGGTATTTTCAGGGC  
ATAAGAAGGAAGCCACTGCGGTAGCCTGGCACCCAGTCCATGAAGGTCTGTTTCGCGAGTGGGGG  
GTCTGATGGTTCCCTGCTCTTTTGGCACGTCGGGGTAGAGAAGGAAGTTGGTGGGATGGAGATG  
GCGCATGAGGGCATGATATGGAGCTTGGCCTGGCACCCCTCTCGACATATACTCTGTAGTGGCA  
GCAATGATCACACATCTAAGTTTTGGACACGGAACAGACCAGGCGATAAAATGCGGGATCGATA  
CAACCTTAATCTGCTTCCCGGGATGAGCGAGGACGGAGTAGAGTACGATGATCTCGAGCCAAAC

AGTCTCGCAGTGATACCCGGCATGGGCATCCCTGAGCAACTCAAATTGGCCATGGAGCAAGAGC  
AGATGGGCAAAGATGAGTCTAACGAAATAGAAATGACCATTCTGGCCTTGATTGGGGGATGGA  
GGAAGTAATGCAGAAAGACCAGAAGAAAGTGCCACAGAAAAAGGTCCCATACGCGAAACCGATT  
CCCGCGCAATTCCAGCAGGCATGGATGCAAAACAAGGTGCCTATCCCGCTCAAATGAAGTCC  
TGAACGATCGAAAAGAGGATATTAAGTGGAGGAGAAAAAAGACGCAAGCAGAAATTGAGCA  
GGAGATGGCCACGTTGCAGTACACGAACCCACAACCTGCTGGAGCAATTGAAAATCGAGCGACTT  
GCGCAGAAACAGGTTGAGCAGATCTAGTAA

### 3xFLAG-Ty1NLS-dPspCas13b-linker-WDR33

MDYKDHGDYKDHDIDYKDDDDKGGNSKKRSLLEDNETEIKVSRDTWNTKNMRSLEPPRSKKRIH  
GGNIPALVENQKKYFGTYSVMAMLNAQTVLDHIQKVADIEGEQNENNENLWFHPVMSHLYNAKN  
GYDKQPEKTMFIIERLQSYFPFLKIMAENQREYSNGKYKQNRVEVNSNDIFEVLKRAFGVLKMY  
RDLTNAYKTYEEKLNDGCEFLTSTEQPLSGMINNYTVALRNMNERYGYKTEDLAFIQDKRFKF  
VKDAYGKKKSQVNTGFFLSLQDYNQDQKHLHSGVGIALLICLFLDKQYINIFLSRLPIFSSY  
NAQSEERRIIIRSGINSIKLPKDRIHSEKSNKSVAMDMLNEVKRCPDELFTTLSAEKQSRFRI  
ISDDHNEVLMKRSSDRFVPLLLQYIDYGKLFDHIRFHVNMGKLYLLKADKTCIDGQTRVRVIE  
QPLNGFGRLEEAEATMRKQENGTFGNSGIRIRDFENMKRDDANPANYPIVDYTYHYILENNKVE  
MFINDKEDSAPLLPVIEDDRYVVKTIPTSCRMSTLEIPAMAFHMFLFGSKKTEKLIVDVHNRKYR  
LFQAMQKEEVTAENIASFGIAESDLPOKILDLISGNAHGKDVDAFIRLTVDDMLTDERRIKRF  
KDDRKSIRSADNKMGRGFKQISTGKLADFLAKDIVLFQPSVNDGENKITGLNYRIMQSAIAVY  
DSGDDYEAKQQFKLMFEKARLIGKGTTEPHFPLYKVFARSIPANAVEFYERYLIERKFYLTGLS  
NEIKKGNRVDVPFIRRDQNKWKTAMKTLGRIYSEDLVELPRQMFQDNEIKSHLKSLLPQMEGID  
FNNANVTYLIAEYMKRVLDDDFQTFYQWNRNYRYMDMLKGEYDRKGSLLQHCFTSVEEREGLWKE  
RASRTERYRKQASNKIRSNRQMRNASSEIETILDKRLSNSRNEYQKSEKVIIRRYRVQDALLFL  
LAKKTLTELADFDGERFKLKEIMPDAEKILSEIMPMSFTFEKGGKTYITSEGMKLKNYGDF  
VLASDKRIGNLLELVGSDIVSKEDIMEEFNKYDQCRPEISSIVFNLEKWAFTYPELSARVDRE  
EKVDFKSILKILLNNKNINKEQSDILRKIRNAFDANNYPDKGVVEIKALPEIAMSIKKAFFEY  
IMKSRGGGSGGGGSTRGSPPRFFHMPRFQHQAPRQLFYKRPDFAQQQAMQQLTFDGKRMKAV  
NRKTIDYNPSVIKYLENRIWQRDQRDMRAIQPDAGYYNDLVPPIGMLNPNMNAVTTKFVRTSTN  
KVKCPVFVVRWTPEGRRLVTGASSGEFTLWNGLTFNFETILQAHDSPVRAMTWSHNDMWMMLTAD  
HGGYVKYWQSNMNNVVMFQAHKEAIREASFSPDNKFATCSDDGTVRIWDFLRCHEERILRGHG  
ADVKCVDWHPTKGLVVSQKDSQQPIKFWDPKTGQSLATLHAHKNTVMEVKLNLNGLNWLTLASR  
DHLCKLFDIRNLKEELQVFRGHKKEATAVAWHPVHEGLFASGGSDGSLFWHVGVVEKEVGGMEM  
AHEGMIWSLAWHPLGHILCSGSNDHTSKFWTRNRPDGKMRDRYNLNLPGMSEDGVEYDDLEPN  
SLAVIPGMGIPEQLKLAMEQEQMGKDESNEIEMTIPGLDWGMEEVMQKDQKKVPQKKVPYAKPI  
PAQFQQAWMQNKVPIAPNEVLNDRKEDIKLEEKKTQAEIEQEMATLQYTNPQLLEQLKIERL  
AQKQVEQI\*\*

### ps-NUDT21

#### 3xFLAG-Ty1NLS-dPspCas13b-linker-NUDT21

ATGGACTACAAAGACCATGACGGTGATTATAAAGATCATGACATCGATTACAAGGATGACGATG  
ACAAGGGCGGAAACTCAAAGAAAAGGTCACTGGAGGACAACGAAACGGAATCAAAGTCTCCAG  
AGACACCTGGAACACTAAGAACATGCGGTCCCTGGAACCGCCACGAAGCAAGAAACGGATACAT  
GGAGGCAACATCCCCGCTCTGGTGGAAAACGAGAAGAAGTACTTTGGCACCTACAGCGTGATGG

CCATGCTGAACGCTCAGACCGTGCTGGACCACATCCAGAAGGTGGCCGATATTGAGGGCGAGCA  
GAACGAGAACAACGAGAATCTGTGGTTTCACCCCGTGATGAGCCACCTGTACAACGCCAAGAAC  
GGCTACGACAAGCAGCCCGAGAAAACCATGTTTCATCATCGAGCGGCTGCAGAGCTACTTCCCAT  
TCCTGAAGATCATGGCCGAGAACCAGAGAGAGTACAGCAACGGCAAGTACAAGCAGAACC GCGT  
GGAAGTGAACAGCAACGACATCTTCGAGGTGCTGAAGCGCGCCTTCGGCGTGCTGAAGATGTAC  
AGGGACCTGACCAACGCATAACAAGACCTACGAGGAAAAGCTGAACGACGGCTGCGAGTTCCTGA  
CCAGCACAGAGCAACCTCTGAGCGGCATGATCAACAATACTACACAGTGGCCCTGCGGAACAT  
GAACGAGAGATACGGCTACAAGACAGAGGACCTGGCCTTCATCCAGGACAAGCGGTTCAAGTTC  
GTGAAGGACGCCTACGGCAAGAAAAAGTCCCAAGTGAATACCGGATTCTTCCTGAGCCTGCAGG  
ACTACAACGGCGACACACAGAAGAAGCTGCACCTGAGCGGAGTGGGAATCGCCCTGCTGATCTG  
CCTGTTCTGACAAGCAGTACATCAACATCTTTCTGAGCAGGCTGCCCATCTTCTCCAGCTAC  
AATGCCCAGAGCGAGGAACGGCGGATCATCATCAGATCCTTCGGCATCAACAGCATCAAGCTGC  
CCAAGGACCGGATCCACAGCGAGAAGTCCAACAAGAGCGTGGCCATGGATATGCTCAACGAAGT  
GAAGCGGTGCCCGACGAGCTGTTCAACAACACTGTCTGCCGAGAAGCAGTCCCGGTTGAGAATC  
ATCAGCGACGACCACAATGAAGTGCTGATGAAGCGGAGCAGCGACAGATTCGTGCCTCTGCTGC  
TGCAGTATATCGATTACGGCAAGCTGTTTCGACCACATCAGGTTCCACGTGAACATGGGCAAGCT  
GAGATACCTGCTGAAGGCCGACAAGACCTGCATCGACGGCCAGACCAGAGTCAGAGTGATCGAG  
CAGCCCCTGAACGGCTTCGGCAGACTGGAAGAGGCCGAGACAATGCGGAAGCAAGAGAACGGCA  
CCTTCGGCAACAGCGGCATCCGGATCAGAGACTTCGAGAACATGAAGCGGGACGACGCCAATCC  
TGCCAACATCCCTACATCGTGGACACCTACACACACTACATCCTGGAAAACAACAAGGTCGAG  
ATGTTTATCAACGACAAAGAGGACAGCGCCCCACTGCTGCCCGTGATCGAGGATGATAGATACG  
TGGTCAAGACAATCCCAGCTGCCGGATGAGCACCTGGAAATTCAGCCATGGCCTTCCACAT  
GTTTCTGTTCCGGCAGCAAGAAAACCGAGAAGCTGATCGTGGACGTGCACAACCGGTACAAGAGA  
CTGTTCCAGGCCATGCAGAAAGAAGAAGTGACCGCCGAGAATATCGCCAGCTTCGGAATCGCCG  
AGAGCGACCTGCCTCAGAAGATCCTGGATCTGATCAGCGGCAATGCCACGGCAAGGATGTGGA  
CGCCTTCATCAGACTGACCGTGGACGACATGCTGACCGACACCGAGCGGAGAATCAAGAGATTC  
AAGGACGACCGGAAGTCCATTCGGAGCGCCGACAACAAGATGGGAAAGAGAGGCTTCAAGCAGA  
TCTCCACAGGCAAGCTGGCCGACTTCTGGCCAAGGACATCGTGCTGTTTCAGCCCAGCGTGAA  
CGATGGCGAGAACAAGATCACCGGCCTGAACTACCGGATCATGCAGAGCGCCATTGCCGTGTAC  
GATAGCGGCGACGATTACGAGGCCAAGCAGCAGTTC AAGCTGATGTTTCGAGAAGGCCCGGCTGA  
TCGGCAAGGGCACAACAGAGCCTCATCCATTTCTGTACAAGGTGTTTCGCCCGCAGCATCCCCGC  
CAATGCCGTGAGTTCACGAGCGCTACCTGATCGAGCGGAAGTTCACCTGACCGGCCTGTCC  
AACGAGATCAAGAAAGGCAACAGAGTGGATGTGCCCTTCATCCGGCGGGACCAGAACAAGTGGA  
AAACACCCGCCATGAAGACCCTGGGCAGAATCTACAGCGAGGATCTGCCCGTGGAACTGCCAG  
ACAGATGTTTCGACAATGAGATCAAGTCCCACCTGAAGTCCCTGCCACAGATGGAAGGCATCGAC  
TTCAACAATGCCAACGTGACCTATCTGATCGCCGAGTACATGAAGAGAGTGCTGGACGACGACT  
TCCAGACCTTCTACCAGTGAACCGCAACTACCGGTACATGGACATGCTTAAGGGCGAGTACGA  
CAGAAAGGGCTCCCTGCAGCACTGCTTACCAGCGTGAAGAGAGAGAAGGCCTCTGGAAAGAG  
CGGGCCTCCAGAACAGAGCGGTACAGAAAGCAGGCCAGCAACAAGATCCGCAGCAACCGGCAGA  
TGAGAAACGCCAGCAGCGAAGAGATCGAGACAATCCTGGATAAGCGGCTGAGCAACAGCCGGAA  
CGAGTACCAGAAAAGCGAGAAAGT GATCCGGCGCTACAGAGTGCAGGATGCCCTGCTGTTTCTG  
CTGGCCAAAAGACCCTGACCGAACTGGCCGATTCGACGGCGAGAGGTTCAAAC TGAAGAAA  
TCATGCCCGACGCCGAGAAGGGAATCCTGAGCGAGATCATGCCCATGAGCTTACCTTCGAGAA  
AGGCGGCAAGAAGTACACCATCACCAGCGAGGGCATGAAGCTGAAGAACTACGGCGACTTCTTT  
GTGCTGGCTAGCGACAAGAGGATCGGCAACCTGCTGGAACCTCGTGGGCAGCGACATCGTGTCCA  
AAGAGGATATCATGGAAGAGTTCAACAATACGACCAGTGCAGGCCCGAGATCAGCTCCATCGT

GTTCAACCTGAAAAGTGGGCCTTCGACACATACCCCGAGCTGTCTGCCAGAGTGGACCGGGAA  
GAGAAGGTGGACTTCAAGAGCATCCTGAAAATCCTGCTGAACAACAAGAACATCAACAAAGAGC  
AGAGCGACATCCTGCGGAAGATCCGGAACGCCTTCGATGCAAACAATTACCCCGACAAAGGCGT  
GGTGAAAATCAAGGCCCTGCCTGAGATCGCCATGAGCATCAAGAAGGCCTTTGGGGAGTACGCC  
ATCATGAAGTCGCGAGGCGGTGGAGGTAGTGGAGGGGGAGGATCAACGCGTTCTGTGGTACCGC  
CCAATCGCTCGCAGACCGGCTGGCCCCGGGGGCTCACTCAGTTCGGCAACAAGTACATCCAGCA  
GACGAAGCCCCTCACCTGGAGCGCACCATCAACCTGTACCCTCTTACCAATTATACTTTTGGT  
ACAAAAGAGCCCCTCTACGAGAAGGACAGCTCTGTTGCAGCCAGATTTTCAGCGCATGAGGGAA  
AATTTGATAAAATTGGAATGAGGAGGACTGTAGAAGGGGTTCTGATTGTACATGAGCACCGGCT  
ACCCCATGTGTTACTGCTGCAGCTGGGAACAACCTTTCTTCAAACCTACCTGGTGGTGAACCTAAC  
CCAGGAGAAGATGAAGTTGAAGGACTAAAACGCTTAATGACAGAGATACTGGTTCGTCAGGATG  
GAGTTTTGCAAGACTGGGTCAATTGACGATTGCATTGGTAACTGGTGGAGACCAAATTTTGAACC  
TCCTCAGTATCCATATATTCTGCACATATTACAAAGCCTAAGGAACATAAGAAGTTGTTTCTG  
GTTTCAGCTTCAAGAAAAAGCCTTGTTTGCAGTCCCTAAAAATTACAAGCTGGTAGCTGCACCAT  
TGTTTGAATTGTATGACAATGCACCAGGATATGGACCCATCATTCTAGTCTCCCTCAGCTGTT  
GAGCAGGTTCAATTTTATTTACAAC TAGTAA

**3xFLAG-Ty1NLS-dPspCas13b-linker-NUDT21**

MDYKDHDGDYKDHDIDYKDDDDKGGNSKKRSLEDNETEIKVSRDTWNTKNMRSLEPPRSKKRIH  
GGNIPALVENQKKYFGTYSVMAMLNAQTVLDHIQKVADIEGEQNNENLWFHPVMSHLYNAKN  
GYDKQPEKTMFI IERLQSYFPFLKIMAENQREYSNGKYQNRVEVNSNDIFEVLKRAFVLMKY  
RDLTNAYKTYEKLNDGCEFLTSTEQPLSGMINNYTVALRNMNERYGYKTEDLAFIQDKRFKF  
VKDAYGKKKSQVNTGFFLSLQDYNGDTQKKLHLSGVGIALLICLFLDKQYINIFLSRLPIFFSY  
NAQSEERRIIIRSFINSIKLPKDRIHSEKSNKSVAMDMLEVKRCPDELFTTLSAEKQSRFRI  
ISDDHNEVLMKRSSDRFVPLLLQYIDYGKLFDHIRFHVNMGKLRLLKADKTCIDGQTRVRVIE  
QPLNGFGRLEEAETMRKQENGTFGNSGIRIRDFENMKRDDANPANYPIVDYTHYILENNKVE  
MFINDKEDSAPLLPVIEDDRYVVKTI PSCRMSTLEIPAMAFHMFLFGSKKTEKLIVDVHNRYKR  
LFQAMQKEEVTAENIASFGIAESDLPQKILDLISGNAHGKDVDAFIRLTVDDMLDTERRIKRF  
KDDRKSIRSADNKMGRGFKQISTGKLADFLAKDIVLFQPSVNDGENKITGLNYRIMQSAIAVY  
DSGDDYEAKQQFKLMFEKARLIGKGTTEPHPLYKVFARSIPANAVEFYERYLIERKFYLTGLS  
NEIKKGNRVDVPFIRRDQNKWKTPAMKTLGRIYSEDLVELPRQMFNEIKSHLKSLLPQMEGID  
FNNANVTYLIAEYMKRVLDDDFQTFYQWNRNYRYMDMLKGEYDRKGS LQHCFTSVEEREGLWKE  
RASRTERYRKQASNKIRSNRQMRNASSEIETILDKRLSNSRNEYQKSEKVI RRYRVQDALLFL  
LAKKTLTELADFDGERFKLKEIMPDAEKILSEIMPMSFTFEKGGKTYITSEGMLKNYGDFF  
VLASDKRIGNLLELVGSDIVSKEDIMEEFNKYDQCRPEISSIVFNLEKWAFTYPELSARVDRE  
EKVDFKSILKILLNNKNINKEQSDILRKIRNAFDANNYPDKGVVEIKALPEIAMSIIKAFGEYA  
IMKSRGGGGSGGGGSTRSVVPPNRSQTGWPRGVTQFGNKYIQQTKPLTLERTINLYPLTNYTFG  
TKEPLYEKDSSVAARFQRMREEFDKIGMRRTVEGV LIVHEHRLPHVLLLQLGTTFFKLPGGELN  
PGEDEVEGLKRLMTEILGRQDGVLDWVIDDCIGNWWRPNFEPQYPYIPA HITKPKHEHKKLFL  
VQLQEKALFAVPKNYKLVAAPL FELYDNAPGYGPIISSLPQLLSRFNFIYN\*\*
